# Supplementary material
Source: MDPI journal article supplement (https://www.mdpi.com/2073-4395/13/11/2813)
Supplement: s1 [file s1]

## Identification of Promising Three-Way Hybrids of Pearl Millet for Drought-Prone Environments of North-Western India

### Supplementary Materials

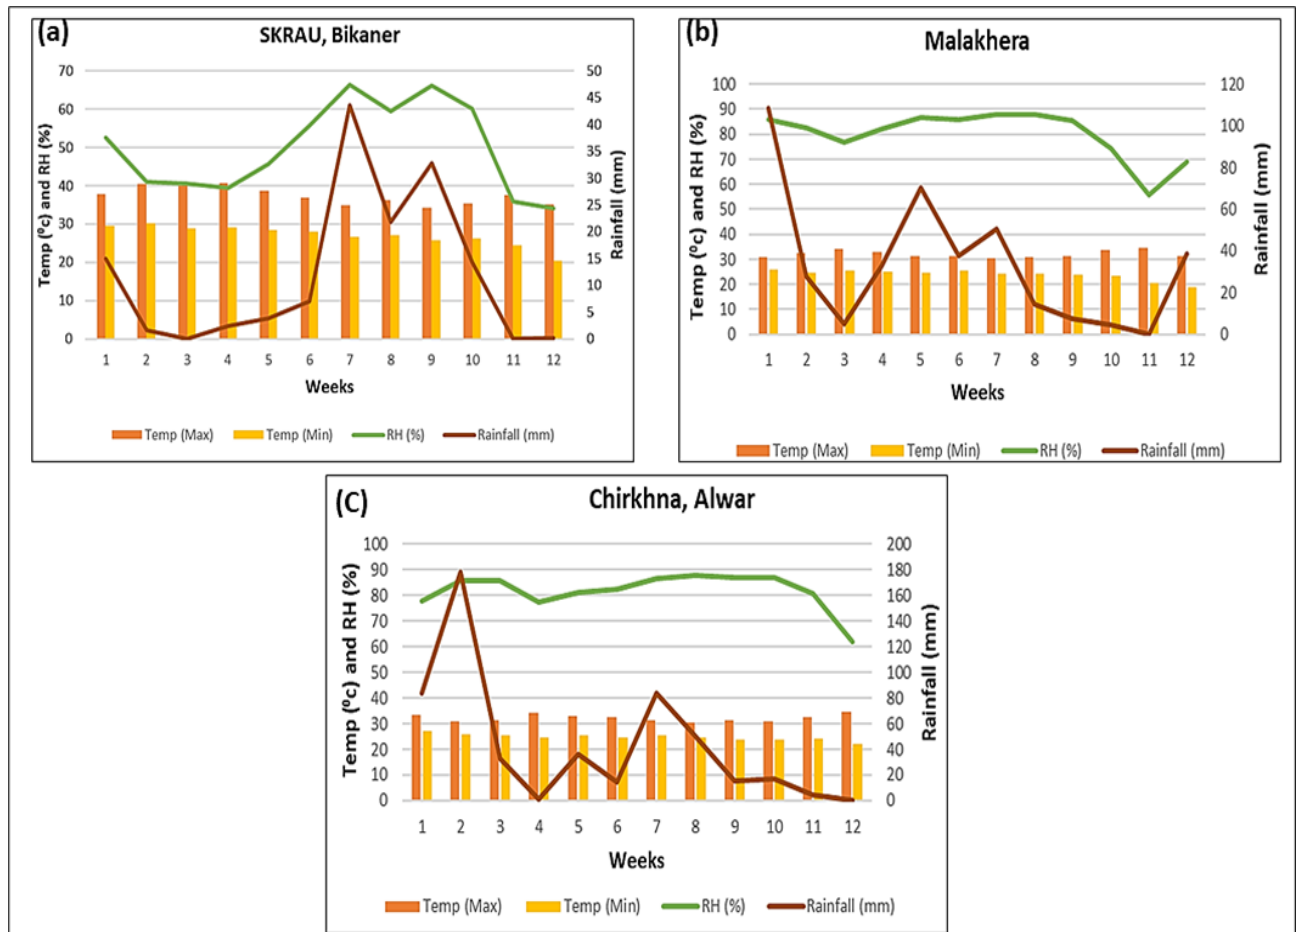

**Figure S1:** Metrological characteristics of the experimental sites (a) SKRAU, Bikaner, (b) Hytech Seeds, Malkhera-Alwar and (c) JK seeds, Chirkhna-Alwar.

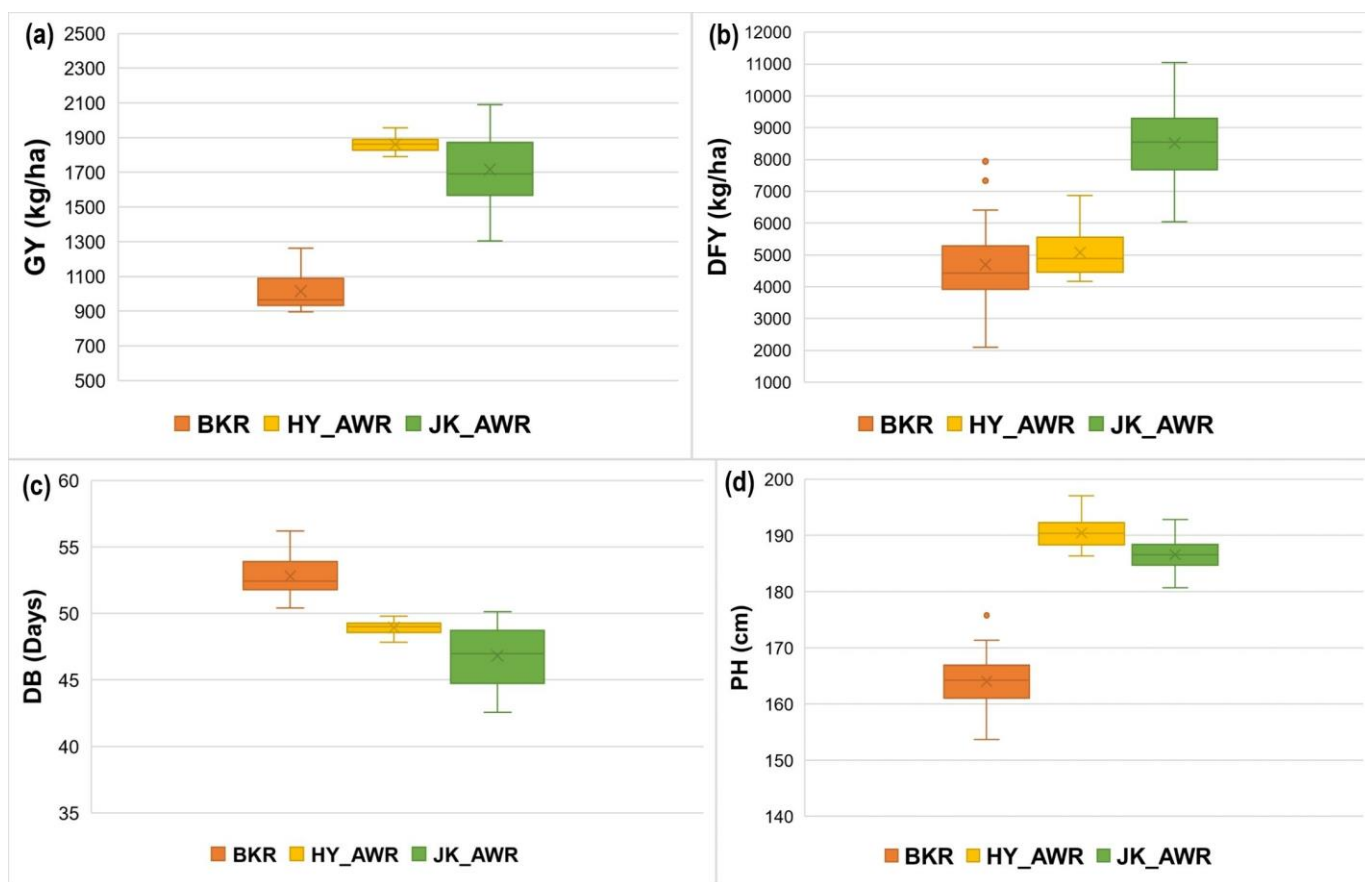

**Figure S2:** Box plot for agro-morphological traits of 36 genotypes across the locations. BKR= SKRAU, Bikaner, Hy\_AWR = Hytech Seeds, Malkhera-Alwar and JK\_AWR = JK seeds, Chirikhna-Alwar. (a) GY = Grain yield (kg/ha), (b) DFY = Dry Fodder Yield (kg/ha), (c) DB= Days to 50% flowering (days), (d) PH = Plant Height (cm). In case of box plot the horizontal line positioned at mid-point within box indicates median value for particular at respective location, while 'x' within box-plot indicates mean value for that particular trait.

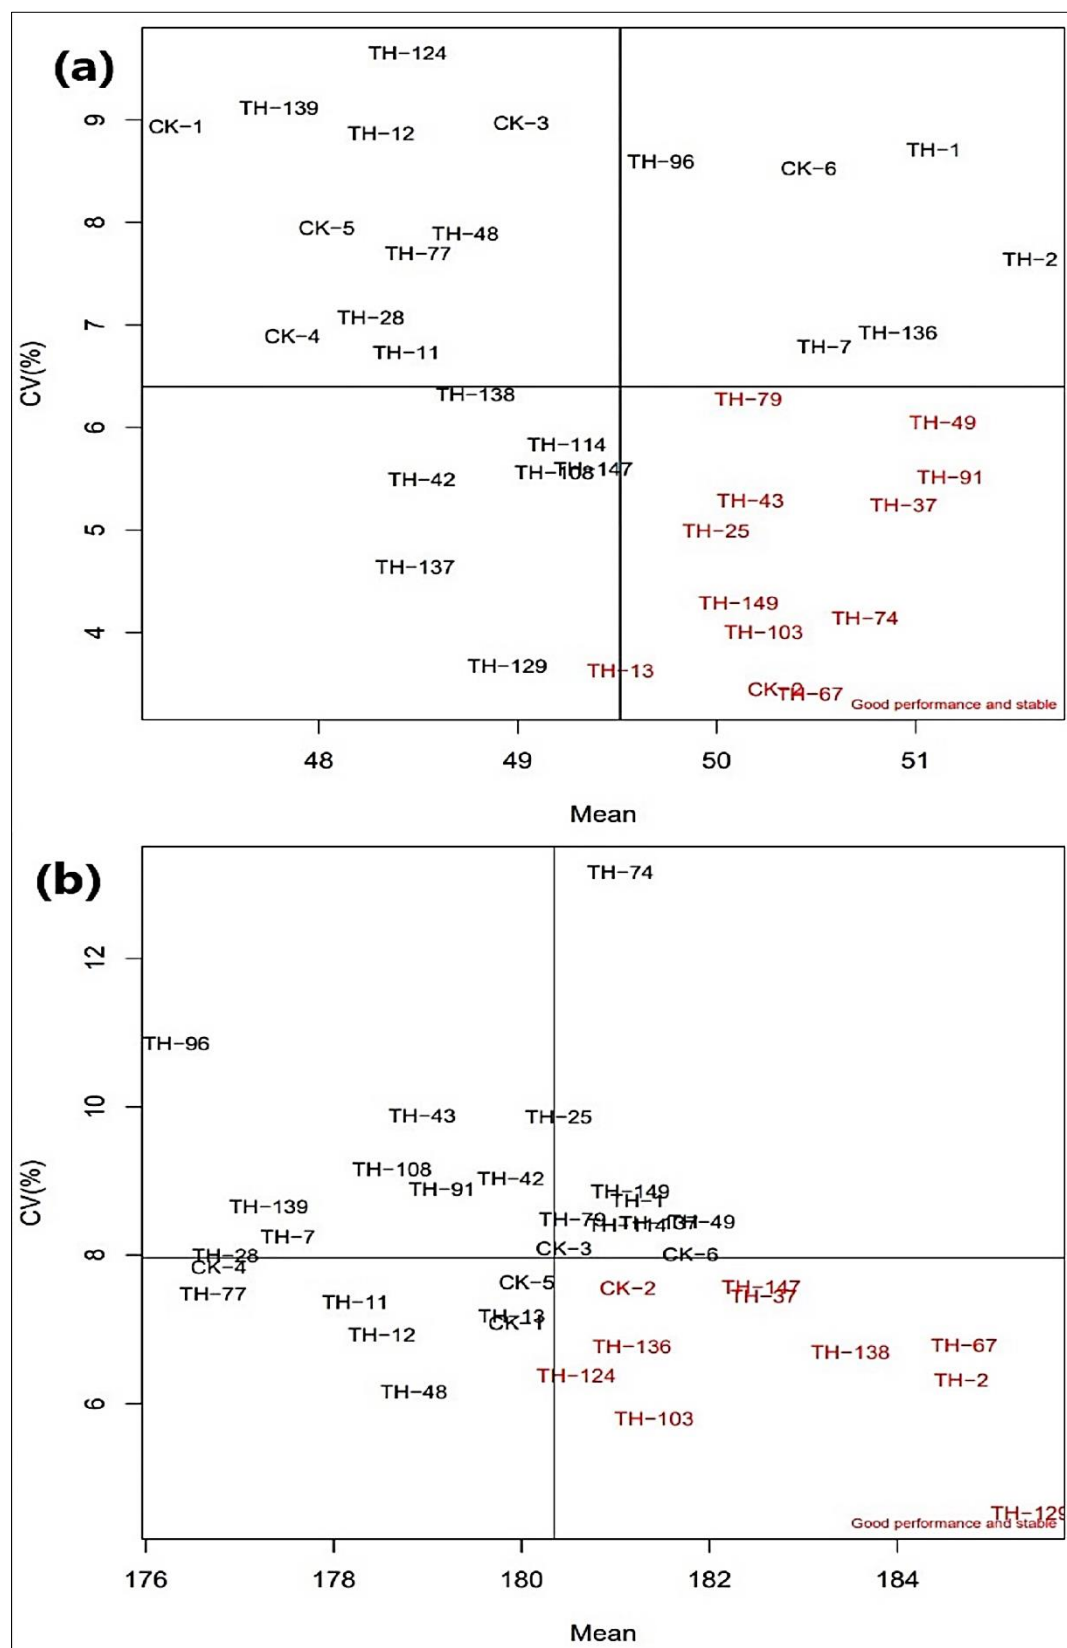

**Figure S3.** Stability (mean yield plotted against CV) parameter for 36 genotypes across the three different locations. (a) DB: days to 50% flowering (days), (b) PH: plant height (cm).

**Table S1.** List of Genotypes and parental details used in experimentation.

| Sr No. | Genotype    | Class | Hybrid parental Code |
|--------|-------------|-------|----------------------|
| 1      | TH-1        | TWH   | (A1 × B2) × R1       |
| 2      | TH-2        | TWH   | (A1 × B2) × R7       |
| 3      | TH-7        | TWH   | (A1 × B3) × R1       |
| 4      | TH-11       | TWH   | (A1 × B3) × R11      |
| 5      | TH-12       | TWH   | (A1 × B3) × R13      |
| 6      | TH-13       | TWH   | (A1 × B4) × R1       |
| 7      | TH-25       | TWH   | (A1 × B6) × R1       |
| 8      | TH-28       | TWH   | (A1 × B6) × R10      |
| 9      | TH-37       | TWH   | (A1 × B8) × R1       |
| 10     | TH-43       | TWH   | (A2 × B3) × R1       |
| 11     | TH-48       | TWH   | (A2 × B3) × R13      |
| 12     | TH-49       | TWH   | (A2 × B4) × R1       |
| 13     | TH-67       | TWH   | (A2 × B7) × R7       |
| 14     | TH-74       | TWH   | (A2 × B8) × R7       |
| 15     | TH-79       | TWH   | (A3 × B4) × R1       |
| 16     | TH-91       | TWH   | (A3 × B6) × R1       |
| 17     | TH-96       | TWH   | (A3 × B6) × R13      |
| 18     | TH-108      | TWH   | (A4 × B6) × R13      |
| 19     | TH-124      | TWH   | (A1 × B3) × R60      |
| 20     | TH-129      | TWH   | (A1 × B4) × R3       |
| 21     | TH-138      | TWH   | (A1 × B4) × R12      |
| 22     | TH-136      | TWH   | (A2 × B3) × R60      |
| 23     | TH-139      | TWH   | (A2 × B4) × R59      |
| 24     | TH-147      | TWH   | (A9 × B10) × R59     |
| 25     | TH-149      | TWH   | (A11 × B1) × R3      |
| 26     | TH-42       | TWH   | (A1 × B8) × R13      |
| 27     | TH-114      | TWH   | (A9 × B10) × R13     |
| 28     | TH-103      | TWH   | (A4 × B6) × R1       |
| 29     | TH-77       | TWH   | (A2 × B8) × R11      |
| 30     | TH-137      | TWH   | (A2 × B4) × R3       |
| 31     | HHB-67 imp  | SCH   | CK-1                 |
| 32     | MPMH 17     | SCH   | CK-2                 |
| 33     | RHB 177     | SCH   | CK-3                 |
| 34     | Dhanashakti | OPV   | CK-4                 |
| 35     | GHB-538     | SCH   | CK-5                 |
| 36     | Raj 171     | OPV   | CK-6                 |

TWH= Three-way Hybrids, SCH= Single cross hybrids, OPV= Open-pollinated variety, CK= check

Table S2. Adjusted mean values of 36 genotypes (34 hybrids and 2 OPVs) for grain yield and component traits across environments.

| Genotype    | DB | GY      | DFY     | PH     | PL    | PD    | PY      | PNHI  | HI    |
|-------------|----|---------|---------|--------|-------|-------|---------|-------|-------|
| TH-1        | 51 | 1563.44 | 7175.61 | 180.90 | 21.80 | 27.33 | 2570.20 | 60.83 | 16.04 |
| TH-2        | 51 | 1668.16 | 7264.64 | 184.41 | 22.30 | 27.42 | 2571.01 | 64.88 | 16.96 |
| TH-7        | 51 | 1622.81 | 6820.91 | 177.04 | 21.67 | 28.59 | 2540.92 | 63.87 | 17.33 |
| TH-11       | 49 | 1528.86 | 6666.82 | 178.03 | 21.52 | 26.68 | 2470.60 | 61.88 | 16.73 |
| TH-12       | 48 | 1467.25 | 6348.15 | 178.10 | 21.56 | 28.86 | 2524.73 | 58.12 | 16.54 |
| TH-13       | 49 | 1458.82 | 6538.07 | 180.02 | 21.93 | 27.96 | 2494.83 | 58.47 | 16.15 |
| TH-25       | 50 | 1511.48 | 6979.70 | 180.60 | 21.09 | 27.19 | 2507.39 | 60.28 | 15.93 |
| TH-28       | 48 | 1547.76 | 7106.76 | 176.45 | 22.07 | 26.37 | 2577.97 | 60.04 | 15.98 |
| TH-37       | 51 | 1563.21 | 6543.91 | 182.81 | 21.38 | 28.42 | 2513.77 | 62.19 | 17.26 |
| TH-43       | 50 | 1543.04 | 7575.64 | 178.86 | 21.45 | 26.30 | 2507.99 | 61.53 | 15.30 |
| TH-48       | 49 | 1489.62 | 6947.52 | 179.07 | 22.12 | 26.62 | 2621.52 | 56.82 | 15.57 |
| TH-49       | 50 | 1739.92 | 7119.07 | 182.49 | 22.26 | 27.69 | 2601.33 | 66.89 | 17.90 |
| TH-67       | 50 | 1713.36 | 7466.55 | 185.08 | 22.34 | 27.92 | 2610.89 | 65.62 | 17.00 |
| TH-74       | 51 | 1689.85 | 8002.87 | 181.38 | 22.14 | 27.11 | 2639.76 | 64.02 | 15.88 |
| TH-79       | 50 | 1663.21 | 7014.66 | 180.62 | 21.52 | 28.00 | 2575.12 | 64.59 | 17.34 |
| TH-91       | 51 | 1613.22 | 7152.14 | 179.09 | 22.40 | 28.11 | 2638.64 | 61.14 | 16.48 |
| TH-96       | 50 | 1400.21 | 6531.19 | 175.97 | 22.24 | 26.52 | 2532.91 | 55.28 | 15.45 |
| TH-108      | 49 | 1458.48 | 6026.56 | 178.87 | 22.23 | 27.98 | 2516.67 | 57.95 | 17.07 |
| TH-124      | 49 | 1605.09 | 6637.25 | 180.69 | 21.56 | 26.89 | 2516.84 | 63.77 | 17.53 |
| TH-129      | 49 | 1434.70 | 7289.04 | 185.02 | 21.86 | 27.33 | 2540.88 | 56.46 | 14.60 |
| TH-138      | 49 | 1645.60 | 7173.85 | 184.28 | 21.09 | 28.05 | 2551.30 | 64.50 | 16.92 |
| TH-136      | 51 | 1588.95 | 6383.32 | 181.44 | 22.10 | 26.93 | 2551.86 | 62.27 | 17.78 |
| TH-139      | 48 | 1432.55 | 6245.58 | 177.16 | 21.63 | 26.53 | 2501.07 | 57.28 | 16.38 |
| TH-147      | 49 | 1388.20 | 8101.65 | 182.57 | 21.39 | 25.50 | 2544.01 | 54.57 | 13.04 |
| TH-149      | 50 | 1485.82 | 7223.42 | 181.02 | 21.57 | 26.64 | 2481.32 | 59.88 | 15.31 |
| TH-42       | 49 | 1386.48 | 6344.79 | 179.63 | 21.91 | 28.45 | 2531.06 | 54.78 | 15.62 |
| TH-114      | 49 | 1688.16 | 6814.68 | 181.17 | 22.01 | 26.98 | 2736.12 | 61.70 | 17.68 |
| TH-103      | 50 | 1446.34 | 7143.95 | 181.04 | 22.58 | 28.27 | 2587.24 | 55.90 | 14.86 |
| TH-77       | 49 | 1372.74 | 6333.28 | 176.28 | 21.95 | 26.75 | 2387.63 | 57.49 | 15.74 |
| TH-137      | 49 | 1387.73 | 6962.63 | 181.64 | 21.69 | 27.74 | 2431.72 | 57.07 | 14.77 |
| HHB-67-Imp  | 48 | 1272.11 | 6633.42 | 179.53 | 21.02 | 25.50 | 2487.22 | 51.15 | 13.95 |
| MPMH 17     | 51 | 1494.99 | 6405.22 | 181.40 | 22.62 | 27.69 | 2640.73 | 57.75 | 16.86 |
| RHB 177     | 49 | 1433.30 | 5728.74 | 180.53 | 21.94 | 28.23 | 2504.51 | 57.23 | 17.41 |
| Dhanashakti | 48 | 1433.12 | 6158.99 | 176.59 | 21.07 | 27.20 | 2525.76 | 56.74 | 16.50 |
| GHB-538     | 48 | 1475.56 | 5721.21 | 180.19 | 21.75 | 25.77 | 2566.62 | 57.49 | 17.80 |
| Raj 171     | 51 | 1414.39 | 6125.68 | 181.47 | 21.56 | 25.95 | 2564.98 | 55.14 | 16.27 |
| Mean        | 50 | 1517.46 | 6797.43 | 180.32 | 21.82 | 27.26 | 2546.31 | 59.60 | 16.28 |
| Std Dev     | 1  | 113.27  | 560.29  | 2.42   | 0.42  | 0.89  | 64.57   | 3.73  | 1.14  |

DB= Days to 50% flowering (days), GY = Grain yield (kg/ha), DFY = Dry Fodder Yield (kg/ha), PH = Plant Height (cm), PL = Panicle Length (cm), PD= Panicle Diameter (mm), PY= Panicle yield (kg/ha), PNHI = Panicle Harvest Index (%), HI = Harvest Index (%).

Table S3. The relative contribution of important traits in genotype clustering pattern

| Trait                 | Eta2     | P-value               |
|-----------------------|----------|-----------------------|
| Grain yield           | 0.698518 | $2.56 \times 10^{-9}$ |
| Harvest Index         | 0.625399 | $9.20 \times 10^{-8}$ |
| Panicle Harvest Index | 0.59255  | $3.68 \times 10^{-7}$ |
| Dry Fodder Yield      | 0.454496 | $4.54 \times 10^{-5}$ |
| Days to 50% flowering | 0.43237  | $8.75 \times 10^{-5}$ |
| Plant Height          | 0.389567 | $2.90 \times 10^{-4}$ |
| Panicle yield         | 0.303201 | $2.58 \times 10^{-3}$ |

Table S4. Genotype by yield×trait (GYT) data for 36 Pearl millet cultivars.

| Sr No | GEN         | Y*PNHI   | Y*PL   | Y*PD   | Y*HI   | Y*DFY       | Y*PH     | Y*PY      | Y/DB |
|-------|-------------|----------|--------|--------|--------|-------------|----------|-----------|------|
| 1     | TH-1        | 95,103   | 34,089 | 42,734 | 25,081 | 1,12,18,618 | 2,82,828 | 40,18,350 | 31   |
| 2     | TH-2        | 1,08,236 | 37,197 | 45,746 | 28,292 | 1,21,18,558 | 3,07,622 | 42,88,840 | 33   |
| 3     | TH-7        | 1,03,644 | 35,170 | 46,391 | 28,130 | 1,10,69,007 | 2,87,308 | 41,23,414 | 32   |
| 4     | TH-11       | 94,610   | 32,906 | 40,797 | 25,581 | 1,01,92,659 | 2,72,190 | 37,77,209 | 32   |
| 5     | TH-12       | 85,269   | 31,641 | 42,338 | 24,263 | 93,14,324   | 2,61,316 | 37,04,413 | 30   |
| 6     | TH-13       | 85,302   | 31,993 | 40,789 | 23,560 | 95,37,833   | 2,62,620 | 36,39,498 | 30   |
| 7     | TH-25       | 91,114   | 31,877 | 41,094 | 24,081 | 1,05,49,675 | 2,72,978 | 37,89,864 | 30   |
| 8     | TH-28       | 92,924   | 34,152 | 40,809 | 24,736 | 1,09,99,571 | 2,73,096 | 39,90,089 | 32   |
| 9     | TH-37       | 97,210   | 33,416 | 44,425 | 26,979 | 1,02,29,505 | 2,85,768 | 39,29,548 | 31   |
| 10    | TH-43       | 94,936   | 33,098 | 40,588 | 23,612 | 1,16,89,547 | 2,75,994 | 38,69,941 | 31   |
| 11    | TH-48       | 84,644   | 32,956 | 39,649 | 23,189 | 1,03,49,136 | 2,66,748 | 39,05,051 | 31   |
| 12    | TH-49       | 1,16,376 | 38,723 | 48,181 | 31,144 | 1,23,86,614 | 3,17,520 | 45,26,105 | 34   |
| 13    | TH-67       | 1,12,437 | 38,277 | 47,829 | 29,130 | 1,27,92,885 | 3,17,109 | 44,73,385 | 34   |
| 14    | TH-74       | 1,08,176 | 37,405 | 45,811 | 26,832 | 1,35,23,636 | 3,06,505 | 44,60,803 | 33   |
| 15    | TH-79       | 1,07,423 | 35,794 | 46,578 | 28,846 | 1,16,66,864 | 3,00,408 | 42,82,973 | 33   |
| 16    | TH-91       | 98,630   | 36,136 | 45,354 | 26,581 | 1,15,37,985 | 2,88,905 | 42,56,708 | 32   |
| 17    | TH-96       | 77,405   | 31,147 | 37,127 | 21,630 | 91,45,039   | 2,46,391 | 35,46,601 | 28   |
| 18    | TH-108      | 84,523   | 32,425 | 40,810 | 24,899 | 87,89,595   | 2,60,881 | 36,70,506 | 30   |
| 19    | TH-124      | 1,02,363 | 34,610 | 43,154 | 28,144 | 1,06,53,358 | 2,90,019 | 40,39,749 | 33   |
| 20    | TH-129      | 81,010   | 31,367 | 39,215 | 20,940 | 1,04,57,606 | 2,65,450 | 36,45,410 | 29   |
| 21    | TH-138      | 1,06,142 | 34,711 | 46,158 | 27,845 | 1,18,05,285 | 3,03,249 | 41,98,409 | 34   |
| 22    | TH-136      | 98,938   | 35,123 | 42,791 | 28,256 | 1,01,42,771 | 2,88,297 | 40,54,780 | 31   |
| 23    | TH-139      | 82,053   | 30,985 | 38,002 | 23,463 | 89,47,075   | 2,53,789 | 35,82,897 | 30   |
| 24    | TH-147      | 75,750   | 29,699 | 35,397 | 18,102 | 1,12,46,706 | 2,53,443 | 35,31,592 | 28   |
| 25    | TH-149      | 88,971   | 32,049 | 39,582 | 22,748 | 1,07,32,668 | 2,68,956 | 36,86,788 | 30   |
| 26    | TH-42       | 75,950   | 30,382 | 39,449 | 21,658 | 87,96,931   | 2,49,053 | 35,09,269 | 29   |
| 27    | TH-114      | 1,04,158 | 37,154 | 45,539 | 29,839 | 1,15,04,308 | 3,05,841 | 46,19,028 | 34   |
| 28    | TH-103      | 80,855   | 32,654 | 40,893 | 21,497 | 1,03,32,599 | 2,61,849 | 37,42,039 | 29   |
| 29    | TH-77       | 78,924   | 30,130 | 36,723 | 21,608 | 86,93,921   | 2,41,987 | 32,77,584 | 28   |
| 30    | TH-137      | 79,195   | 30,094 | 38,491 | 20,500 | 96,62,285   | 2,52,070 | 33,74,588 | 29   |
| 31    | HNB-67 imp  | 65,064   | 26,745 | 32,437 | 17,743 | 84,38,449   | 2,28,387 | 31,64,017 | 27   |
| 32    | MPMH 17     | 88,066   | 34,492 | 42,229 | 25,709 | 97,67,886   | 2,76,636 | 40,27,082 | 30   |
| 33    | RHB 177     | 82,026   | 31,449 | 40,460 | 24,952 | 82,10,990   | 2,58,760 | 35,89,716 | 29   |
| 34    | Dhanashakti | 81,315   | 30,201 | 38,979 | 23,649 | 88,26,547   | 2,53,070 | 36,19,711 | 30   |
| 35    | GHB-538     | 84,831   | 32,091 | 38,020 | 26,271 | 84,42,002   | 2,65,887 | 37,87,212 | 31   |
| 36    | Raj 171     | 77,993   | 30,494 | 36,698 | 23,019 | 86,64,132   | 2,56,665 | 36,27,891 | 28   |
|       | Mean        | 90,877   | 33,134 | 41,424 | 24,792 | 1,03,45,460 | 2,73,878 | 38,70,307 | 31   |
|       | St Dev      | 12,124   | 2,641  | 3,619  | 3,111  | 13,27,069   | 21,560   | 3,47,577  | 2    |

GEN = Genotype, Y = Grain yield, DFY = Dry Fodder Yield, PNHI = Panicle Harvest Index, DB= Days to 50% flowering, PH = Plant Height, PL = Panicle Length, PD= Panicle Diameter, PY= Panicle yield, HI = Harvest Index and SI = Superiority Index.
